# Supplementary material for: Doxorubicin and resveratrol co-delivery nanoparticle to overcome doxorubicin resistance
Source: PubMed Central journal article supplement (PMC5059704; doi:10.1038/srep35267), 2016-10-12

## **Supplementary Information**

### **Doxorubicin and resveratrol co-delivery nanoparticle to overcome doxorubicin resistance**

Yuan Zhao<sup>1</sup>, Meng-lei Huan<sup>1#</sup>, Miao Liu<sup>1#</sup>, Ying Cheng<sup>1</sup>, Yang Sun<sup>2</sup>, Han Cui<sup>1</sup>,  
Dao-zhou Liu<sup>1</sup>, Qi-bing Mei<sup>2</sup>, Si-yuan Zhou<sup>1,2\*</sup>

<sup>1</sup>Department of Pharmaceutics, School of Pharmacy, Fourth Military Medical University, Xi'an, 710032, China.

<sup>2</sup>Key laboratory of gastrointestinal pharmacology of Chinese medicine, Fourth Military Medical University, Xi'an, 710032, China.

\*Corresponding author; #The author contributed equally to this work.

Running title: co-delivery of doxorubicin and resveratrol.

Corresponding author: Si-yuan Zhou.

Tel: 86 29 84776783.

Fax: +86 29 84779212.

E-mail: zhousy@fmmu.edu.cn

Mail address: Changle West Road 17, Shaanxi province, Xi'an, 710032, China.

Conflicts of Interest/Disclosures: None

**Supplementary figure 1. Synthetic route of CHO-hyd-PEG-AA.**

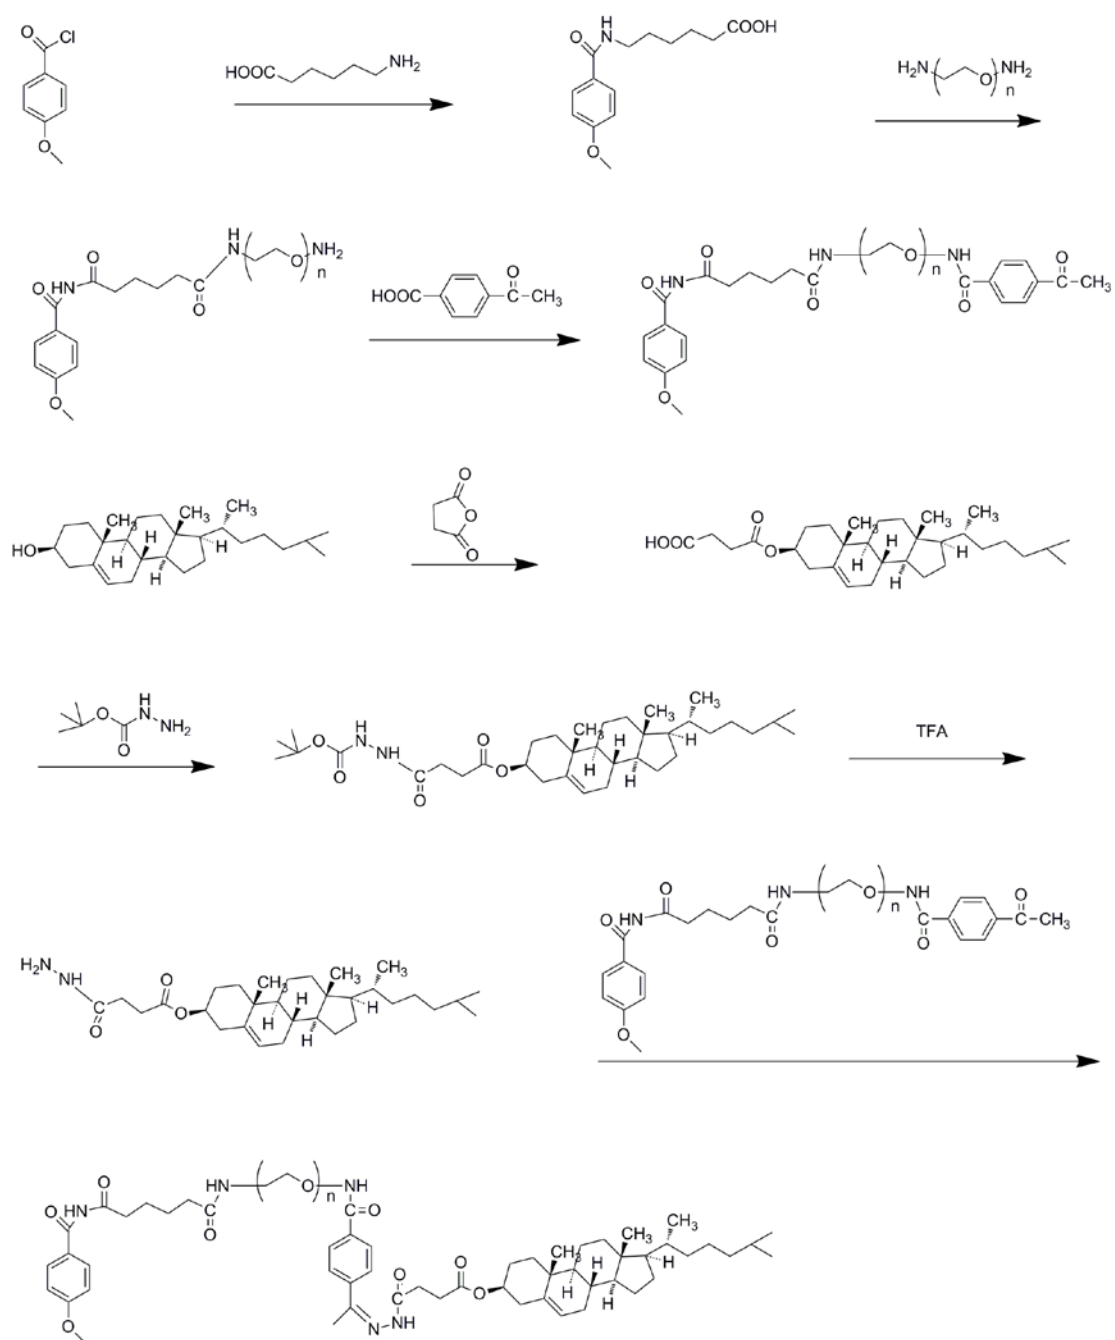

**Supplementary figure 2.** The  $^1\text{H}$  NMR spectrum (dissolved in  $\text{CHCl}_3$ ) of CHO-hyd-PEG-AA.

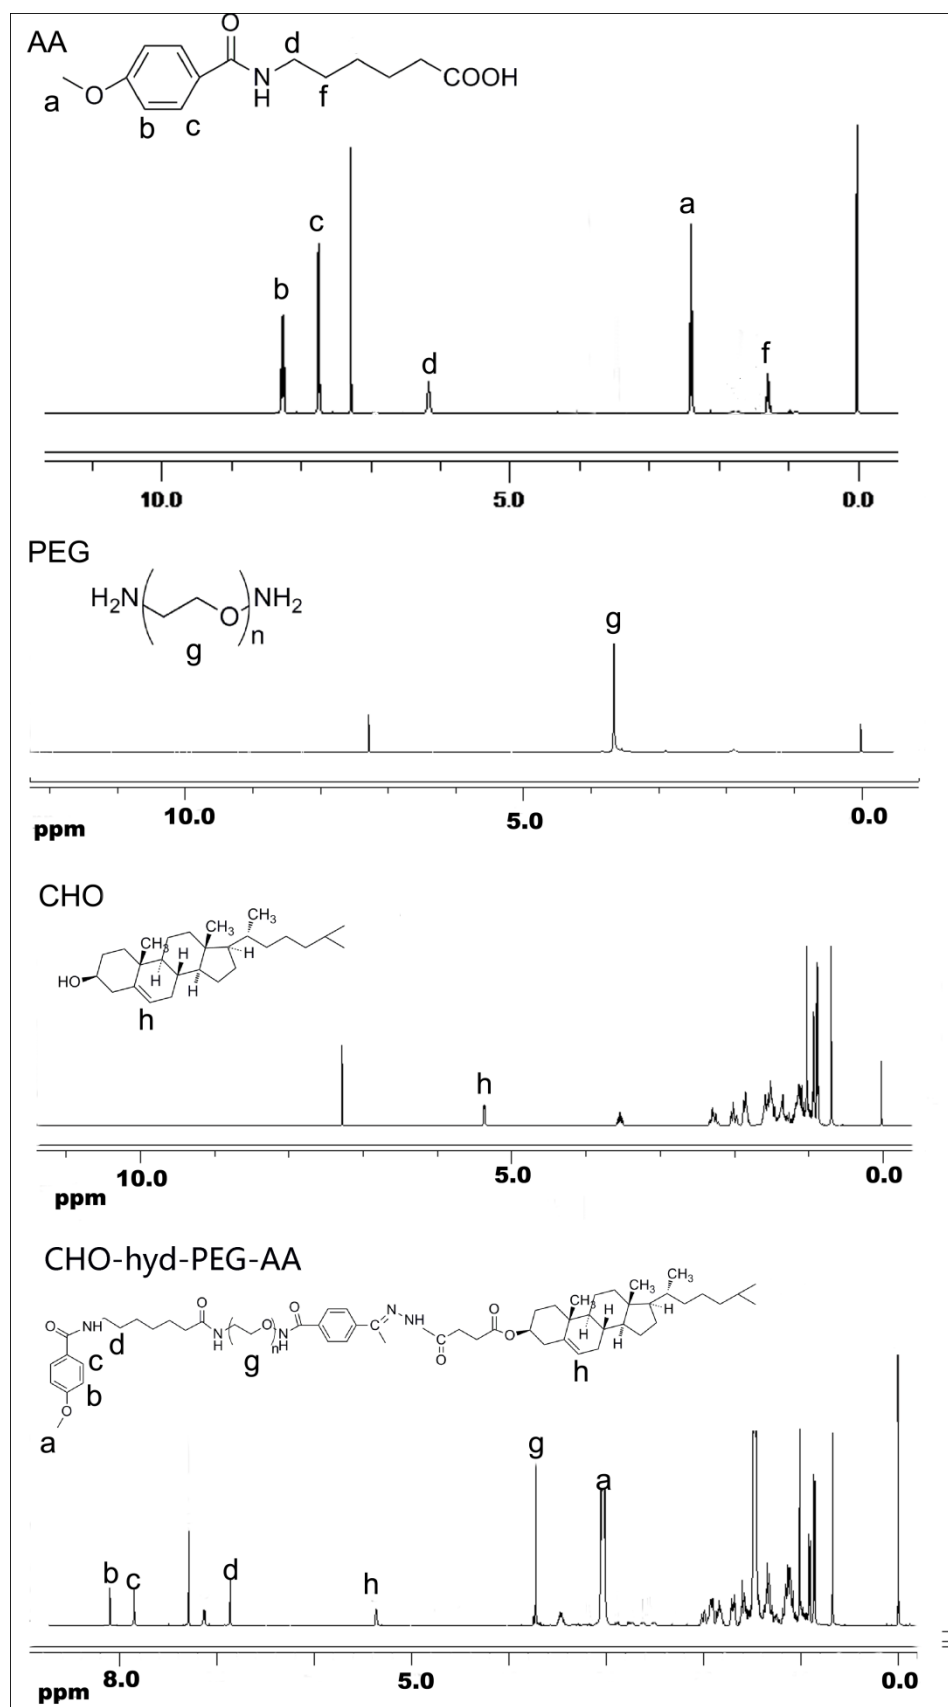

**Supplementary figure 3.** The FTIR spectrum of CHO-hyd-PEG-AA.

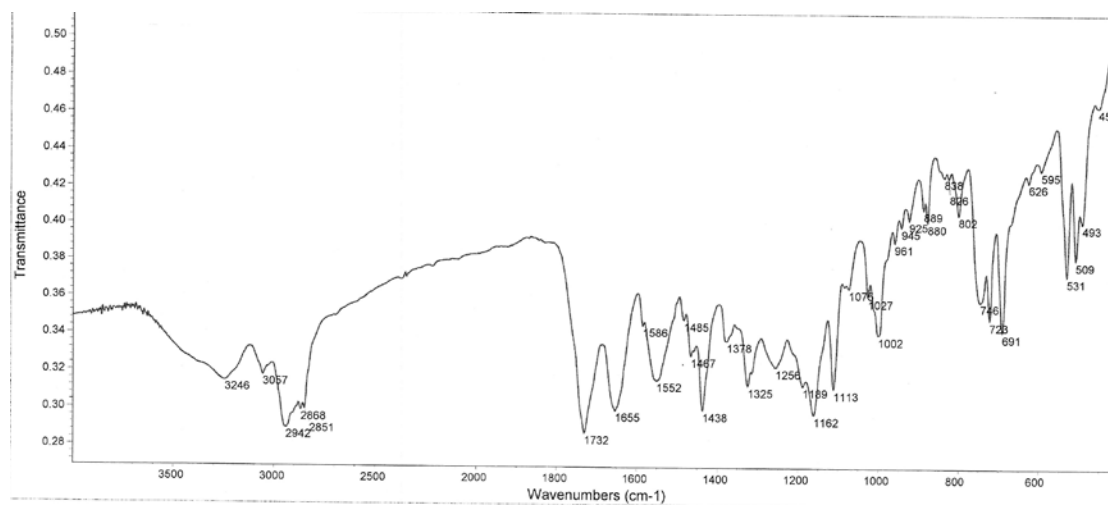

**Supplementary figure 4.** Cytotoxicity of blank nanoparticle on MDA-MB-231/ADR cells (A) and MCF-7/ADR cells (B).

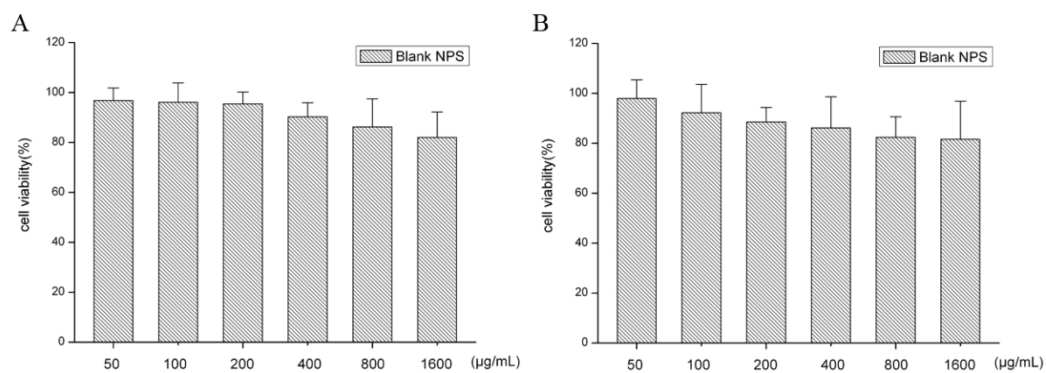

**Supplementary figure 5.** Cell cycle analysis after MCF-7/ADR cells were cultured with free DOX, free RES, MIX and DOX/RES-loaded NPS for 24 h. Panel A is the typical pictures of flow cytometry in MCF-7/ADR cells. Panel B is the statistic results of cell cycle. Panel C is the western blot analysis of cell cycle-related proteins expression. Data are mean±SD, n=3, \*p<0.05, \*\*p<0.01, vs control or PBS.

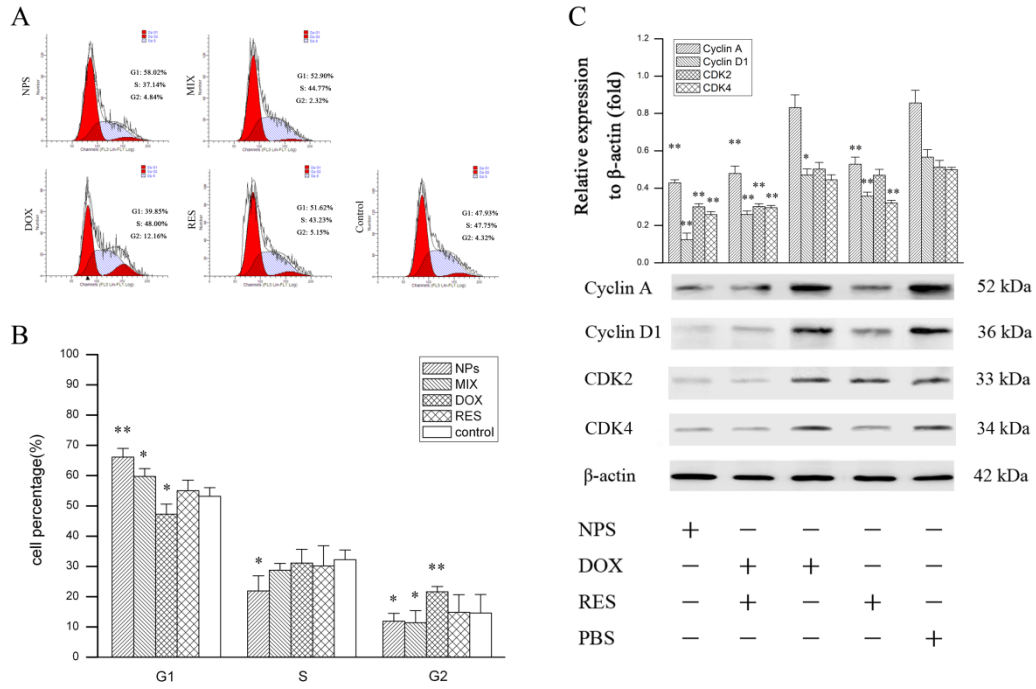

Supplement: srep35267-s1.pdf [file srep35267-s1.pdf]
